# Supplementary material for: Delayed Contralateral Nephrectomy Halted Post-Ischemic Renal Fibrosis Progression and Inhibited the Ischemia-Induced Fibromir Upregulation in Mice
Source: MDPI journal article supplement (doi:10.3390/biomedicines9070815), 2021-07-14
Supplement: s1 [file s1]

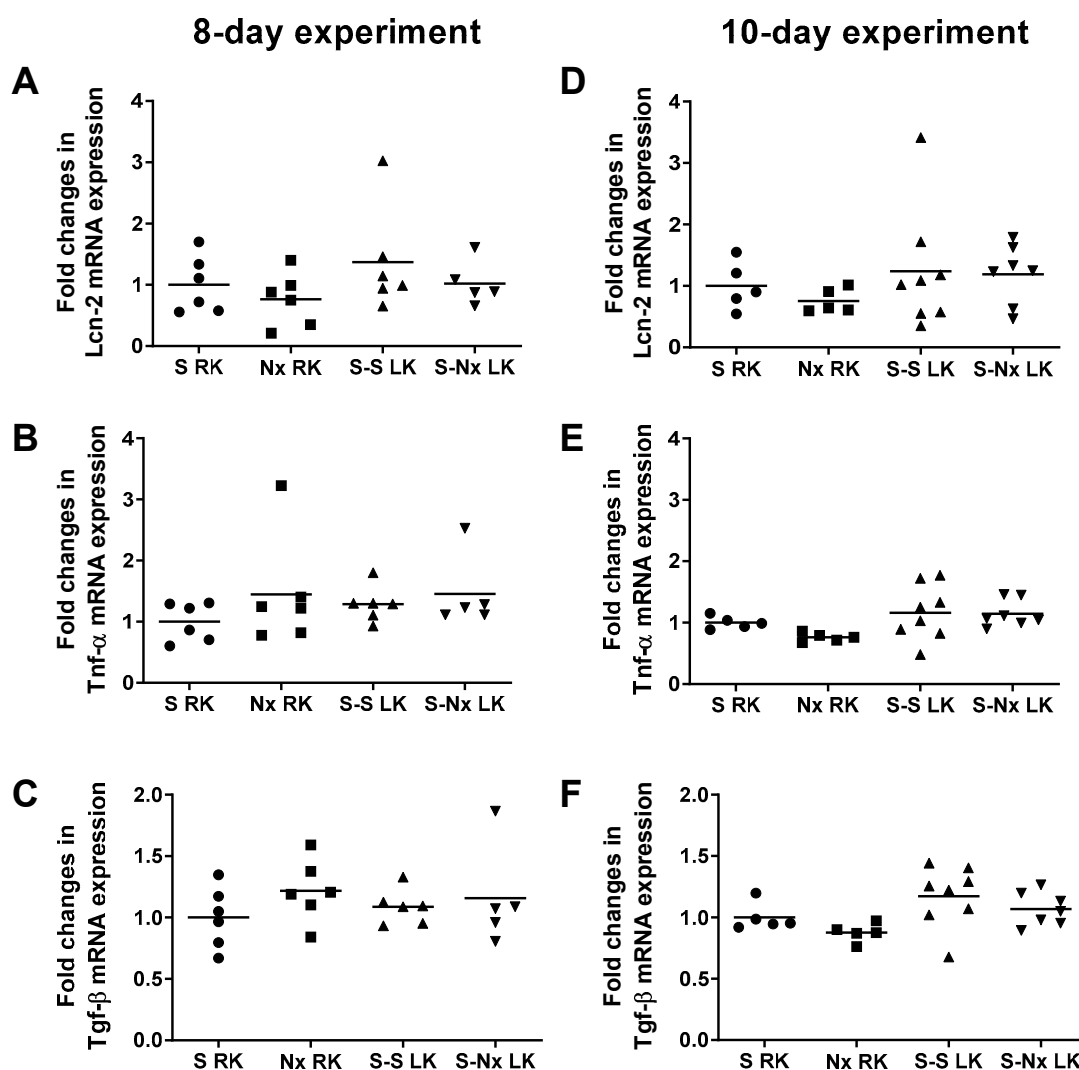

**Supplementary Figure S1.** Tnf-α, Tgf-β and Lcn-2 mRNA expression in the control kidney in the 8-day and 10-day experiments. S RK: right kidneys removed at the termination of the experiments, Nx RK: right kidneys removed at nephrectomy, S-S LK: sham-sham left kidneys, S-Nx LK: sham-Nx left kidneys. A-C: 8-day experiment, D-F: 10-day experiment. A, D: Lcn-2, B, E: Tnf-α, C, F: Tgf-β.

**Supplementary Table S1.** miRNAs upregulated at least 1.5-fold in the kidneys 8 days after IR based on the miRNA microarray (IR-S vs. S-S).

|   | miRNA           | Fold change | p<     |    | miRNA           | Fold change | p<     |
|---|-----------------|-------------|--------|----|-----------------|-------------|--------|
| 1 | mmu-miR-21a-5p  | 6.13±0.63   | 0.0000 | 23 | mmu-miR-15b-5p  | 1.85±0.13   | 0.0000 |
| 2 | mmu-miR-2137    | 5.31±1.88   | 0.0004 | 24 | mmu-miR-34a-5p  | 1.83±0.29   | 0.0022 |
| 3 | mmu-miR-142-3p  | 4.48±1.31   | 0.0001 | 25 | mmu-miR-19a-3p  | 1.81±0.14   | 0.0000 |
| 4 | mmu-miR-762     | 4.15±1.46   | 0.0005 | 26 | mmu-miR-17-3p   | 1.76±0.22   | 0.0000 |
| 5 | mmu-miR-223-3p  | 3.79±0.79   | 0.0000 | 27 | mmu-miR-20a-5p  | 1.75±0.31   | 0.0006 |
| 6 | mmu-miR-142-5p  | 3.58±0.81   | 0.0002 | 28 | mmu-miR-1892    | 1.72±0.25   | 0.0000 |
| 7 | mmu-miR-2861    | 3.08±0.94   | 0.0011 | 29 | mmu-miR-489-5p  | 1.72±0.13   | 0.0000 |
| 8 | mmu-miR-3102-5p | 2.99±0.77   | 0.0001 | 30 | mmu-miR-106a-5p | 1.71±0.16   | 0.0000 |
| 9 | mmu-miR-199a-5p | 2.97±0.39   | 0.0000 | 31 | mmu-miR-3095-3p | 1.68±0.28   | 0.0002 |

|    |                                  |           |        |    |                 |           |        |
|----|----------------------------------|-----------|--------|----|-----------------|-----------|--------|
| 10 | mmu-miR-199a-3p/ mmu-miR-199b-3p | 2.92±0.53 | 0.0000 | 32 | mmu-miR-19b-3p  | 1.65±0.13 | 0.0001 |
| 11 | mmu-miR-199b-5p                  | 2.89±0.54 | 0.0002 | 33 | mmu-miR-23a-3p  | 1.64±0.13 | 0.0000 |
| 12 | mmu-miR-711                      | 2.46±0.66 | 0.0146 | 34 | mmu-miR-1894-3p | 1.58±0.27 | 0.0010 |
| 13 | mmu-miR-3473b                    | 2.42±0.79 | 0.0300 | 35 | mmu-miR-503-5p  | 1.54±0.23 | 0.0005 |
| 14 | mmu-miR-214-3p                   | 2.33±0.16 | 0.0000 | 36 | mmu-miR-674-5p  | 1.53±0.17 | 0.0002 |
| 15 | mmu-miR-146b-5p                  | 2.27±0.64 | 0.0015 | 37 | mmu-miR-25-5p   | 1.53±0.25 | 0.0006 |
| 16 | mmu-miR-3970                     | 2.20±0.31 | 0.0001 | 38 | mmu-miR-27a-3p  | 1.53±0.16 | 0.0003 |
| 17 | mmu-miR-146a-5p                  | 2.15±0.45 | 0.0002 | 39 | mmu-miR-665-3p  | 1.53±0.14 | 0.0000 |
| 18 | mmu-miR-21a-3p                   | 2.13±0.36 | 0.0000 | 40 | mmu-miR-290a-5p | 1.52±0.22 | 0.0009 |
| 19 | mmu-miR-5129-5p                  | 2.07±0.82 | 0.0283 | 41 | mmu-miR-710     | 1.52±0.25 | 0.0029 |
| 20 | mmu-miR-3100-3p                  | 2.01±0.36 | 0.0000 | 42 | mmu-miR-3084-3p | 1.51±0.11 | 0.0004 |
| 21 | mmu-miR-17-5p                    | 1.87±0.12 | 0.0000 | 43 | mmu-miR-24-2-5p | 1.50±0.09 | 0.0002 |
| 22 | mmu-miR-20b-5p                   | 1.86±0.26 | 0.0001 |    |                 |           |        |

**Supplementary Table S2.** List of miRNAs downregulated at least 1.5-fold in the kidney 8 days after IR based on the miRNA microarray. (IR-S vs. S-S).

|    | miRNA            | Fold change | p<     |    | miRNA                                       | Fold change | p<     |
|----|------------------|-------------|--------|----|---------------------------------------------|-------------|--------|
| 1  | mmu-miR-129-1-3p | 0.31±0.06   | 0.0000 | 16 | mmu-miR-30e-5p                              | 0.62±0.06   | 0.0000 |
| 2  | mmu-miR-193a-3p  | 0.42±0.08   | 0.0000 | 17 | mmu-miR-378b                                | 0.62±0.05   | 0.0000 |
| 3  | mmu-miR-1839-3p  | 0.45±0.10   | 0.0000 | 18 | mmu-miR-34b-3p                              | 0.63±0.06   | 0.0000 |
| 4  | mmu-miR-150-5p   | 0.47±0.05   | 0.0000 | 19 | mmu-miR-505-5p                              | 0.63±0.06   | 0.0000 |
| 5  | mmu-miR-3961     | 0.48±0.06   | 0.0000 | 20 | mmu-miR-669l-3p                             | 0.63±0.11   | 0.0000 |
| 6  | mmu-miR-190a-5p  | 0.48±0.04   | 0.0000 | 21 | mmu-miR-192-5p                              | 0.63±0.13   | 0.0005 |
| 7  | mmu-miR-365-3p   | 0.51±0.09   | 0.0000 | 22 | mmu-miR-30c-5p                              | 0.64±0.03   | 0.0000 |
| 8  | mmu-miR-194-5p   | 0.54±0.07   | 0.0002 | 23 | mmu-miR-344h-3p                             | 0.64±0.05   | 0.0000 |
| 9  | mmu-miR-34c-3p   | 0.55±0.08   | 0.0000 | 24 | mmu-miR-378a-3p/ mmu-miR-378b/ mmu-miR-378c | 0.64±0.07   | 0.0000 |
| 10 | mmu-miR-455-3p   | 0.56±0.04   | 0.0000 | 25 | mmu-miR-1192                                | 0.64±0.09   | 0.0002 |
| 11 | mmu-miR-187-3p   | 0.57±0.05   | 0.0000 | 26 | mmu-miR-378a-3p                             | 0.65±0.07   | 0.0004 |
| 12 | mmu-miR-29c-3p   | 0.57±0.09   | 0.0003 | 27 | mmu-miR-215-5p                              | 0.65±0.11   | 0.0014 |
| 13 | mmu-miR-669m-3p  | 0.60±0.10   | 0.0000 | 28 | mmu-miR-126a-5p                             | 0.65±0.04   | 0.0001 |
| 14 | mmu-miR-677-3p   | 0.62±0.05   | 0.0000 | 29 | mmu-miR-30e-3p                              | 0.66±0.06   | 0.0001 |
| 15 | mmu-miR-185-5p   | 0.62±0.06   | 0.0003 |    |                                             |             |        |

**Supplementary Table S3.** Validation of the miRNA miArray with qPCR. Statistical comparison of miRNA expression normalized to let-7g between the S-S, IR-S and IR-Nx groups.

|              | p, ANOVA significance | p, S-S vs. IR-S | p, IR-Nx vs. IR-S |
|--------------|-----------------------|-----------------|-------------------|
| miR-21a-5p   | 0.000                 | 0.000           | 0.347             |
| miR-2137     | 0.011                 | 0.009           | 0.304             |
| miR-142a-3p  | 0.000                 | 0.000           | 0.946             |
| miR-762      | 0.900                 | -               | -                 |
| miR-223-3p   | 0.000                 | 0.000           | 0.309             |
| miR-142a-5p  | 0.000                 | 0.000           | 0.940             |
| miR-3102-5p  | 0.136                 | -               | -                 |
| miR-199a-5p  | 0.000                 | 0.001           | 0.420             |
| miR-199a-3p  | 0.000                 | 0.000           | 1.000             |
| miR-214-3p   | 0.000                 | 0.000           | 0.896             |
| miR-146a-5p  | 0.000                 | 0.001           | 0.990             |
| miR-21a-3p   | 0.000                 | 0.000           | 0.008             |
| miR-129-1-3p | 0.174                 | -               | -                 |

**Supplementary Table S4.** Comparison of miRNA expression normalized to let-7g between the S-S, S-Nx left kidneys and the control right kidneys.

|             | p, ANOVA significance |                   |
|-------------|-----------------------|-------------------|
|             | 8-day experiment      | 10-day experiment |
| miR-21a-3p  | 0.078                 | 0.668             |
| miR-21a-5p  | 0.935                 | 0.364             |
| miR-142a-3p | 0.379                 | 0.756             |
| miR-142a-5p | 0.086                 | 0.523             |
| miR-146a-5p | 0.328                 | 0.974             |
| miR-199a-3p | 0.104                 | 0.865             |
| miR-199a-5p | 0.321                 | 0.559             |
| miR-214-3p  | 0.166                 | 0.837             |
| miR-223-3p  | 0.297                 | 0.588             |
